# Supplementary material
Source: ML conference proceedings conference paper supplement (https://proceedings.neurips.cc/paper_files/paper/2011/hash/0336dcbab05b9d5ad24f4333c7658a0e-Abstract.html)
Supplement: Supplementary file [file 0336dcbab05b9d5ad24f4333c7658a0e-Supplemental.zip]

---

# Supplementary Material

## Learning Higher-Order Graph Structure with Features by Structure Penalty

---

**Shilin Ding<sup>1</sup>, Grace Wahba<sup>1,2,3</sup>, and Xiaojin Zhu<sup>2</sup>**

Department of <sup>1</sup>Statistics, <sup>2</sup>Computer Sciences, <sup>3</sup>Biostatistics and Medical Informatics}  
 University of Wisconsin-Madison, WI 53705  
 {sding, wahba}@stat.wisc.edu, jerryzhu@cs.wisc.edu

### 1 Multivariate Bernoulli model

The multivariate Bernoulli (MVB) model of  $K$  random variables has  $2^K - 1$  natural parameters [1]. Given the predictive variable  $X$ , these parameters are functions of  $X$ , called conditional log odds ratios. From the distribution of the MVB,  $f^\omega(X)$  can be written as:

$$f^\omega(x) = \log OR(Y_i, i \in \omega | Y_j = 0, j \notin \omega; X = x) \quad (1)$$

Here, the odds ratios are calculated recursively

$$OR(Y_i | X = x) = \frac{P(Y_i = 1 | X = x)}{1 - P(Y_i = 1 | X = x)}, \quad (2)$$

$$OR(Y_i, i \in \omega \cup \{k\} | X = x) = \frac{OR(Y_i, i \in \omega | Y_k = 1, X = x)}{OR(Y_i, i \in \omega | Y_k = 0, X = x)}, \text{ with } k \notin \omega \quad (3)$$

The following two notations are useful in optimization and parameter tuning:

$$S^\omega(y; x) = \sum_{\kappa \subseteq \omega} y^\kappa f^\kappa(x); \quad S^\omega(x) = \sum_{\kappa \subseteq \omega} f^\kappa(x); \quad (4)$$

It follows from the definition of the conditional log odds ratio in (1) that

$$\exp(S^\omega(x)) = \frac{P(Y_i = 1, i \in \omega, \text{ and } Y_j = 0, j \in \Omega \setminus \omega | X = x)}{P(Y_i = 0, i \in \omega | X = x)} \quad (5)$$

Then the normalization factor is:

$$\exp(b(f(x))) = 1 + \sum_{\omega \in \Psi_K} \exp(S^\omega(x)) \quad (6)$$

In practice, the  $\exp(b(f(x)))$  is calculated by the junction tree algorithm to avoid enumerating  $2^K$  possible values of  $Y$ , which is intractable in large graphs.

### 2 Dual of the proximal linearization problem

To solve the following objective of the proximal linearization problem

$$\min_c L_k + \nabla L_k^T(c - c_k) + \frac{\alpha_k}{2} \|c - c_k\|^2 + \lambda J(c) \quad (7)$$

we solve its dual problem as suggested in Liu and Ye [2]. Let  $Z = \{v \in \Psi_K | \|c^{T_v}\| = 0\}$ , and  $\bar{Z} = \Psi_K - Z$  be the complement. Define  $s_v, v \in \Psi_K$  as:

$$s_v \in \mathbb{S}_v = \{s = (s^\omega)_{\omega \in \Psi_K} \mid s \in \mathbb{R}^{\bar{P}}, \|s\| \leq \lambda p_v, s^\omega = 0 \text{ if } \omega \in T_v\} \quad (8)$$

then the subgradient of (7) is:

$$\nabla L + \alpha_k(c - c_k) + \sum_{v \in Z} s_v + \sum_{u \in \bar{Z}} r_u \quad (9)$$

where  $s_v$  is the subgradient of  $\lambda p_v \|c^{T_v}\|$  for  $v \in Z$  and  $r_u$  is the subgradient for  $u \in \bar{Z}$ :

$$r_u = \arg \max_{s_u} \langle s_u, c \rangle, \text{ for } u \in \bar{Z} \quad (10)$$

The subgradient  $s_v$  is in a unit ball of certain subspace of  $\mathbb{R}^{\bar{p}}$ . These subspaces are not perpendicular to each other. Thus,  $s_v$ 's are not separable, and closed form solution of (7) cannot be obtained. We solve the proximal subproblem (7) by its smoothing and convex dual problem. Note (7) is equivalent to:

$$\min_{c \in \mathbb{R}^{\bar{p}}} \max_{S \in \mathbb{S}} \phi(c, S) = \nabla L_k^T(c - c_k) + \frac{\alpha_k}{2} \|c - c_k\|^2 + \sum_{v \in \Omega} \langle s_v, c \rangle \quad (11)$$

where  $S$  is a  $\tilde{p} \times |\Psi_K|$  matrix whose columns are  $s_v$ .  $\mathbb{S} = \{S | S = (s_1, \dots, s_v, \dots, s_\Omega), s_v \in \mathbb{S}_v \text{ for } v \in \Psi_K\}$  is the feasible region of  $S$ . Since  $\phi(\cdot, S)$  is lower semicontinuous and  $\phi(c, \cdot)$  is upper semicontinuous, there exists a saddle point and the max and min are exchangeable. The solution of minimizing  $\phi(c, S)$  is:

$$\tilde{c} = \arg \min_c \phi(c, S) = c_k - \frac{1}{\alpha_k} \nabla L_k - \frac{1}{\alpha_k} \sum_v s_v \quad (12)$$

Substitute  $\tilde{c}$  back into (11), we have the dual problem of (7) as:

$$\max_{S \in \mathbb{S}} \eta(S) = -\frac{1}{2} \left\| \sum_v s_v \right\|^2 + (\alpha_k c_k - \nabla L_k)^T \sum_v s_v \quad (13)$$

Following the proof in Liu and Ye [2], we can show that  $\eta(S)$  is convex and Lipschitz continuous. The differential is  $\alpha_k \tilde{c} e^T$  where  $e \in \mathbb{R}^{\bar{p}}$  is a vector of ones. Hence, (13) can be solved by existing gradient methods.

### 3 B-spline

Given  $m$  knots,  $t_0 \leq t_1 \leq \dots \leq t_{m-1}$ , the B-spline basis functions of degree  $d$  are defined recursively [3]:

$$b_{k,0} = \begin{cases} 1; & \text{if } t_k \leq t < t_{k+1} \\ 0; & \text{otherwise} \end{cases}, \text{ for } k = 0, \dots, m-2$$

$$b_{k,l} = \frac{t - t_k}{t_{k+l} - t_k} b_{k,l-1}(t) + \frac{t_{k+l+1} - t}{t_{k+l+1} - t_{k+1}} b_{k+1,l-1}(t), \text{ for } k = 0, \dots, m-d-2; l = 0, \dots, d$$

Let  $B_k(\cdot) = b_{k,d}(\cdot)$ , then  $\{B_k, k = 0, \dots, m-d-2\}$  are  $m-d-1$  basis functions, which span the functional space  $\mathcal{B}$ . The B-spline curve in  $\mathcal{B}$  is:

$$g(t) = \sum_{k=0}^{m-d-2} c_k B_k(t) \quad (14)$$

where  $c_k$ 's are the control points to be estimated. In our simulation studies,  $c_k$ 's are assumed to be one dimensional scalars for simplicity.

We let each  $f^\omega(x)$  where  $x = (x_1, \dots, x_p)'$  be in  $\mathcal{B}_0 \oplus \mathcal{B}_1 \oplus \dots \oplus \mathcal{B}_p$ . Here,  $\mathcal{B}_0$  is a space of constant functions and  $\mathcal{B}_j, j = 1 \dots, p$  is a B-spline functional space on domain  $x_j \in \mathcal{X}_j$ . Therefore,

$$f^\omega(x) = c_0^\omega + \sum_{j=1}^p g_j(x_j) \quad (15)$$

where  $g_j(x_j) \in \mathcal{B}_j$  are defined in (14).

## 4 Tuning

For  $i$ -th data point  $(y(i), x(i))$ , denote  $S_i^\omega = S^\omega(x(i))$ , then the normalization factor of the  $i$ -th data is  $b_i = b(f(x(i))) = \log(1 + \sum_\omega \exp S_i^\omega)$ . The mean of the augmented response  $\mathcal{Y}(i)$  in the MVB model is:

$$\mu(i) = E[\mathcal{Y}(i)|x(i), f] = (\mu^1(i), \dots, \mu^\kappa(i), \dots, \mu^\Omega(i)) \quad (16)$$

$$\text{where } \mu^\kappa(i) = \frac{\partial b_i}{\partial f^\kappa} = \frac{\sum_{\omega \in T_\kappa} \exp S_i^\omega}{\exp b_i} \quad (17)$$

The  $|\Psi_K| \times |\Psi_K|$  covariance matrix of the augmented response is:

$$W(i) = \text{var}(\mathcal{Y}(i)|x(i), f) \quad (18)$$

where the  $(\alpha, \beta)$ -th element of  $W(i)$  is:

$$W_{\alpha, \beta}(i) = \frac{\partial^2 b_i}{\partial f^\alpha (\partial f^\beta)^T} = \frac{\sum_{\omega \in T_\alpha \cap T_\beta} \exp S_i^\omega}{\exp b_i} - \mu^\alpha(i) \cdot \mu^\beta(i) \quad (19)$$

Let  $R_v$  be a  $\tilde{p} \times \tilde{p}$  diagonal matrix whose  $(i, i)$ -th element is 1 if  $c_i \neq 0$ . Then, the  $v$ -th group penalty  $J(f^{T_v})$  can be written as:

$$J(f^{T_v}) = p_v \sqrt{\sum_{\omega \in T_v} \|f^\omega\|^2} = p_v \|R_v c\| \quad (20)$$

Note  $R_v$  is symmetric and  $R_v \cdot R_v = R_v$ , direct calculation yields the derivative and Hessian of the penalty term:

$$\frac{\partial J}{\partial c} = \sum_{v: R_v c \neq 0} p_v \frac{R_v c}{\|R_v c\|} \quad (21)$$

$$\frac{\partial^2 J}{\partial c \partial c^T} = \sum_{v: R_v c \neq 0} p_v J_v = \sum_{v: R_v c \neq 0} p_v \frac{R_v (\|R_v c\|^2 I - c \cdot c^T) R_v}{\|R_v c\|^3} \quad (22)$$

where  $J_v \doteq (R_v (\|R_v c\|^2 I - c \cdot c^T) R_v) / \|R_v c\|^3$ . Denote the grand design matrix as:

$$D = (D(1)^T \quad \dots \quad D(n)^T)^T \quad (23)$$

$$\text{where } D(i) = \begin{pmatrix} x(i)^T & 0 & \dots & 0 \\ 0 & x(i)^T & \dots & 0 \\ \vdots & \vdots & \ddots & \vdots \\ 0 & 0 & \dots & x(i)^T \end{pmatrix} \quad (24)$$

Suppose there are  $N$  non-zero elements of  $c$  at location  $\{a_1, \dots, a_N\}$ . Let  $\tilde{D}$  be the matrix composed by the  $a_1, \dots, a_N$ th column of  $D$ . Then, the Hessian matrix of  $I_\lambda$  is:

$$\frac{\partial^2 I_\lambda}{\partial c \partial c^T} = \frac{\partial^2 L}{\partial c \partial c^T} + \lambda \frac{\partial^2 J}{\partial c \partial c^T} = \tilde{D}^T W \tilde{D} + \lambda \sum_{v: R_v c \neq 0} p_v J_v \quad (25)$$

Let  $H$  be the  $n|\Psi_K| \times n|\Psi_K|$  influence matrix that implies

$$f_{\lambda, \epsilon} - f_\lambda \approx H \epsilon \quad (26)$$

where  $\epsilon$  is a small perturbation on  $\mathcal{Y}$ ;  $f_\lambda = D c_\lambda$  is the estimated function value with tuning parameter  $\lambda$ ; and  $f_{\lambda, \epsilon}$  is the estimated function value with the perturbation. Then, the analysis of the first order Taylor expansion of  $\frac{\partial I_\lambda}{\partial c}(\mathcal{Y} + \epsilon, c_{\lambda, \epsilon})$  leads to the formulation of  $H$  as follows (refer to Xiang and Wahba [4] and Ma [5] Chapter 3 for more details)

$$H = \tilde{D} \left( \frac{\partial^2 I_\lambda}{\partial c \partial c^T} \right)^{-1} \tilde{D}^T = \tilde{D} \left( \tilde{D}^T W \tilde{D} + \lambda \sum_{v: R_v c \neq 0} p_v J_v \right)^{-1} \tilde{D}^T \quad (27)$$

The  $(i, j)$ -th  $q \times q$  submatrix of  $H$  is

$$H(i, j) = \tilde{D}(i)^T \left( \frac{\partial^2 I_\lambda}{\partial c \partial c^T} \right)^{-1} \tilde{D}(j) \quad (28)$$

Let  $Q(i) = I - H(i, i)W(i)$  for  $i = 1, \dots, n$ , define the generalized average matrix, denoted as  $\bar{Q}$ , of  $\{Q(i), i = 1, \dots, n\}$  as follows

$$\bar{Q} = (\delta - \gamma)I_{q \times q} + \gamma \cdot ee^T = \begin{pmatrix} \delta & \gamma & \cdots & \gamma \\ \gamma & \delta & \cdots & \gamma \\ \vdots & \vdots & \ddots & \vdots \\ \gamma & \gamma & \cdots & \delta \end{pmatrix} \quad (29)$$

where  $e$  is the unit vector of length  $q$  and

$$\delta = \frac{1}{nq \sum_{i=1}^n \text{tr}(Q(i))}, \quad \gamma = \frac{1}{nq(q-1)} [e^T Q(i)e - \text{tr}(Q(i))] \quad (30)$$

Let  $\bar{H}$  be the generalized average of  $\{H(i, i), i = 1, \dots, n\}$ , the GACV score is

$$GACV(\lambda) = OBS(\lambda) + \frac{1}{n} \sum_{i=1}^n \mathcal{Y}(i)^T \bar{Q}^{-1} \bar{H} (\mathcal{Y}(i) - \mu(i)) \quad (31)$$

where

$$OBS(\lambda) = \frac{1}{n} \left[ -\mathcal{Y}(i)^T f_\lambda(x(i)) + b(f_\lambda(x(i))) \right] \quad (32)$$

is the observed log-likelihood.

The degrees of freedom of multivariate Bernoulli data is generally difficult to obtain. But we can have a good approximation from GACV [6] as

$$\hat{df}(\lambda) = \sum_{i=1}^n \mathcal{Y}(i)^T \bar{Q}^{-1} \bar{H} (\mathcal{Y}(i) - \mu(i)) \quad (33)$$

So the BGACV score can be defined as

$$BGACV(\lambda) = OBS(\lambda) + \frac{1}{n} \frac{\log n}{2} \sum_{i=1}^n \mathcal{Y}(i)^T \bar{Q}^{-1} \bar{H} (\mathcal{Y}(i) - \mu(i)) \quad (34)$$

For the model selection criteria AIC, the degree of freedom is approximated by the number of non-zero  $c_{jk}$ 's in the group penalty.

## References

- [1] J. Whittaker. *Graphical models in applied multivariate statistics*. Wiley (Chichester England and New York), 1990.
- [2] J. Liu and J. Ye. Fast overlapping group lasso. *arXiv:1009.0306v1*, 2010.
- [3] C. De Boor. *A practical guide to splines*. Applied Mathematical Sciences, 1978.
- [4] D. Xiang and G. Wahba. A generalized approximate cross validation for smoothing splines with non-Gaussian data. *Statistica Sinica*, 6:675–692, 1996.
- [5] Xiwen Ma. *Penalized Regression in Reproducing Kernel Hilbert Spaces With Randomized Covariate Data*. PhD thesis, Department of Statistics, University of Wisconsin-Madison, 2010.
- [6] W. Shi, G. Wahba, S. Wright, K. Lee, R. Klein, and B. Klein. LASSO-Patternsearch algorithm with application to ophthalmology and genomic data. *Statistics and its Interface*, 1(1):137, 2008.
